# Supplementary material
Source: PubMed Central journal article supplement (PMC7541615)
Supplement: NIHMS1625686-supplement-216_2020_2904_MOESM1_ESM.pdf [file NIHMS1625686-supplement-216_2020_2904_MOESM1_ESM.pdf]

**Analytical and Bioanalytical Chemistry**

**Electronic Supplementary Material**

**Metabolomic profiling and comparison of major cinnamon species using  
UHPLC–HRMS**

Yifei Wang, Peter de B. Harrington, Pei Chen

Table S1. Summary of USP monographs on identification of *C. cassia* and *C. verum* barks using different assays. Thin-layer chromatography (TLC) methods were not included in the table

| Analysis                                        | <i>C. cassia</i> bark                                                                                                                                                         | <i>C. verum</i> bark                                                                                                                                             |
|-------------------------------------------------|-------------------------------------------------------------------------------------------------------------------------------------------------------------------------------|------------------------------------------------------------------------------------------------------------------------------------------------------------------|
| HPLC - Content of phenylpropanoids and coumarin | <p>Cinnamaldehyde: 0.90% – 3.60% on the anhydrous basis</p> <p>Cinnamic acid: 0.030% – 0.10% on the anhydrous basis</p> <p>Coumarin: 0.17% – 0.60% on the anhydrous basis</p> | <p>Cinnamaldehyde: 0.75% – 3.0% on the anhydrous basis</p> <p>Cinnamic acid: ≤ 0.030% on the anhydrous basis</p> <p>Coumarin: ≤ 0.17% on the anhydrous basis</p> |
| Folin-Ciocalteu Assay - Total phenolic content  | Total phenolic content: ≥ 80 mg gallic acid equivalent per g on the anhydrous basis                                                                                           | Total phenolic content: ≥ 100 mg gallic acid equivalent per g on the anhydrous basis                                                                             |
| GC - Content of eugenol                         | NA                                                                                                                                                                            | Eugenol: 0.015% – 0.40%                                                                                                                                          |
